# Supplementary material for: Dominant optic atrophy in Denmark – report of 15 novel mutations in OPA1, using a strategy with a detection rate of 90%
Source: PubMed Central journal article supplement (PMC3507804; doi:10.1186/1471-2350-13-65), 2012-08-02
Supplement: 1471-2350-13-65-S1.pdf [file 1471-2350-13-65-S1.pdf]

| Exon/cdna segment | Forward primer (5'→3')                               | Inverse complement(5'→3')                            |
|-------------------|------------------------------------------------------|------------------------------------------------------|
| 1                 | accactgcttactggcttacc<br>ctgctgagggccacttct          | gaggggcaaacaacagatggc<br>tcctgtcattctgggtcctc        |
| 2                 | accactgcttactggcttacc<br>ttgctctttaaagtcatctt        | gaggggcaaacaacagatggc<br>catccaattgtattccactacaca    |
| 3                 | accactgcttactggcttacc<br>catgtttattggcatgcag         | gaggggcaaacaacagatggc<br>tttctcttcctcgagatgacc       |
| 4                 | accactgcttactggcttacc<br>gggttgcatgaggattaaaca       | gaggggcaaacaacagatggc<br>catgtatcttctccatggttc       |
| 5                 | accactgcttactggcttacc<br>aggctgtgacatcactgga         | gaggggcaaacaacagatggc<br>tggatgtttgtattgctctc        |
| 6                 | accactgcttactggcttacc<br>aaaaattaactgtgtacattctg     | gaggggcaaacaacagatggc<br>cacctccaaatttgctctg         |
| 7                 | accactgcttactggcttacc<br>tcaagatttggagatttaatttag    | gaggggcaaacaacagatggc<br>cacacaacgtaagcggtaaaa       |
| 8                 | accactgcttactggcttacc<br>caatgattatgaaaaacaattga     | gaggggcaaacaacagatggc<br>ttgctaagacattacttgaaca      |
| 9                 | accactgcttactggcttacc<br>aaaaactcagagcagcattacaaa    | gaggggcaaacaacagatggc<br>tgaacaggctcactgaagca        |
| 10 + 11           | accactgcttactggcttacc<br>gcaatgcagtagccctgtct        | gaggggcaaacaacagatggc<br>gcagcaatctaaacatcaatacc     |
| 12 + 13           | accactgcttactggcttacc<br>gaattttagaatacatttcacaaaa   | gaggggcaaacaacagatggc<br>tggattgctaaagaagaaaacat     |
| 14                | accactgcttactggcttacc<br>ttgctataatgtagacacagggta    | gaggggcaaacaacagatggc<br>tcacagctggagctttaca         |
| 15 + 16           | accactgcttactggcttacc<br>ttttgctttctaaattgtatattacgc | gaggggcaaacaacagatggc<br>tgaaaacagttcaatttaagctactc  |
| 17                | accactgcttactggcttacc<br>tgggtgtagtattgtgtcctttt     | gaggggcaaacaacagatggc<br>atgccaaagattgccagcta        |
| 18                | accactgcttactggcttacc<br>aaccactacatctgaaagaagg      | gaggggcaaacaacagatggc<br>agcttatcagatcttctcaaca      |
| 19                | accactgcttactggcttacc<br>tctgaaaatcatgacagggtaaa     | gaggggcaaacaacagatggc<br>caaggcaacaataaatcactgc      |
| 20                | accactgcttactggcttacc<br>tgatactcagtcaagctgtttt      | gaggggcaaacaacagatggc<br>cagctcctactccctcaga         |
| 21                | accactgcttactggcttacc<br>ttttcatgttaaccattgaagtatg   | gaggggcaaacaacagatggc<br>cctatgaaaaagtatcaatttgagaag |
| 22                | accactgcttactggcttacc<br>ggaaggatattttatgctggtt      | gaggggcaaacaacagatggc<br>ttggatgactcctcaccact        |
| 23                | accactgcttactggcttacc<br>cctttattcaactgccttca        | gaggggcaaacaacagatggc<br>tggctagagccacaaaaagg        |
| 24                | accactgcttactggcttacc                                | gaggggcaaacaacagatggc                                |

|               |                                                     |                                                     |
|---------------|-----------------------------------------------------|-----------------------------------------------------|
|               | caagcaccaaattatgaacca                               | tgcaagaaacaaatattaaggaagc                           |
| 25            | accactgcttactggcttacc<br>tgtacaacttctcagtgtggtga    | gaggggcaaacaacagatggc<br>gcatatttgacaactgttgctt     |
| 26            | accactgcttactggcttacc<br>cgatgatagtttcattttaactttgc | gaggggcaaacaacagatggc<br>tggaagtattttggcatcc        |
| 27            | accactgcttactggcttacc<br>tcttattcattataaaaaacgatgc  | gaggggcaaacaacagatggc<br>aatgggaaaggtggaaagg        |
| 28            | accactgcttactggcttacc<br>ctcctgatttggatgacctttg     | gaggggcaaacaacagatggc<br>caagcaggatgtaaatgaagca     |
| Alternativ 4b | accactgcttactggcttacc<br>tgccaattattgccttacc        | gaggggcaaacaacagatggc<br>tgcaattttattgcaactagtttatt |
| Alternativ 5b | accactgcttactggcttacc<br>cttggcaccctggcttacc        | gaggggcaaacaacagatggc<br>ctggcagaaatggctgatt        |
