# Supplementary material for: Dominant optic atrophy in Denmark – report of 15 novel mutations in OPA1, using a strategy with a detection rate of 90%
Source: PubMed Central journal article supplement (PMC3507804; doi:10.1186/1471-2350-13-65), 2012-08-02
Supplement: 1471-2350-13-65-S3.pdf [file 1471-2350-13-65-S3.pdf]

| Family and Patient ID      | Age at Onset | VA R L (Age)      | VA R L (Age)      | Refraction R/L sph.eq. | Fundus | Color vision                           | VEP flash                            | VEP checkerboard                   |
|----------------------------|--------------|-------------------|-------------------|------------------------|--------|----------------------------------------|--------------------------------------|------------------------------------|
| <b>Exon 9; c.938A&gt;G</b> |              |                   |                   |                        |        |                                        |                                      |                                    |
| 139a                       | 7            | 6/36<br>6/24 (12) | 6/60<br>6/60 (37) | -3.5/-4.5              | TP     | Mild R-G defect                        | ND                                   | ND                                 |
| 140a                       | 4            | 6/24<br>6/24 (5)  | 6/60<br>6/36 (14) | Emmetropia             | TP     | Mild R-G and B-Y defect                | Spike trains                         | Normal                             |
| 140c                       | 14           | 6/36<br>3/36 (37) | 3/36<br>3/60 (66) | +1.5/+5.5              | TP     | Moderate defect without specified axis | Reduced amplitude, prolonged latency | Severely reduced                   |
| 140d                       | ND           | 6/60<br>6/60 (29) | 3/60<br>3/60 (78) | Emmetropia             | TP     | ND                                     | Reduced amplitude, severely reduced  | ND                                 |
| 140e                       | 7            | 3/60<br>3/60 (53) |                   | -6.25/-4.75            | TP     | ND                                     | Reduced amplitudes, normal latency   | Reduced amplitude, normal latency  |
| 140f                       | 7            | 6/9<br>6/6 (7)    | 6/12<br>6/12 (31) | -0.5/-0.25             | TP     | Moderate defect without specified axis | ND                                   | Normal                             |
| 140g                       | 7            | 6/36<br>6/18 (16) | 6/60<br>6/36 (52) | Emmetropia             | TP     | ND                                     | Spike trains                         | Spikes and prolonged latency       |
| 141b                       | 7            | 6/24<br>6/36 (36) |                   | -2.5/-2.5              | TP     | Mild R-G and B-Y defect                | Normal                               | Severely reduced amplitudes        |
| 141d                       | 29           | 6/9<br>6/9 (22)   | 6/12<br>6/36 (28) | Emmetropia/<br>-0.75   | Normal | Normal                                 | Normal                               | Normal                             |
| 141e                       | ND           | 6/36<br>6/60 (44) |                   | +0.5/+11.25            | TP     | Moderate R-G and B-Y defect            | ND                                   | ND                                 |
| 142a                       | 22           | 6/12<br>6/12 (22) | 6/18<br>6/12 (47) | +1.0/Emmetropia        | TP     | Mild R-G and strong B-Y defect         | Spikes, prolonged latency            | Reduced amplitudes, normal latency |
| 142b                       | ND           | 6/12<br>6/12 (71) |                   | +2.0/+1.75             |        | Moderate R-G defect                    |                                      | ND                                 |
| 143a                       | 62           | 6/12<br>6/18 (67) |                   | +1.25/+0.75            | TP     | Mild R-G and B-Y defect                | Spikes, prolonged latency            | Reduced amplitudes, normal latency |
| 143b                       | ND           | 6/6<br>6/6 (38)   |                   | ND                     | Normal | ND                                     | ND                                   | ND                                 |
| 143c                       | ND           | 6/12<br>6/9 (38)  |                   | Emmetropia             | Normal | ND                                     | ND                                   | ND                                 |
| 143d                       | 3            | 6/24<br>6/18 (7)  |                   | +2.5/+2.5              | Normal | Normal                                 | ND                                   | ND                                 |
| 143e                       | 10           | 6/12<br>6/12 (15) |                   | -1.25/-0.75            | TP     | Mild B-Y defect                        | Normal                               | Reduced amplitudes, normal latency |
| 144a                       | 18           | 6/12<br>6/18 (22) | 6/18<br>6/24 (34) | -1.25/-1.25            | TP     | Mild B-Y defect                        | Normal                               | Reduced amplitudes                 |
| 144b                       | 7            | 6/12<br>6/12 (26) | 6/12<br>6/12 (38) | Emmetropia             | TP     | Normal                                 | Normal                               | Severely reduced amplitudes        |
| 144c                       | 5            | 6/36<br>6/60 (15) | 6/36<br>3/60 (37) | -0.5/-0.5              | TP     | Moderate B-Y defect                    | Normal                               | Normal                             |
| 144d                       | 7            | 3/60<br>3/60 (37) |                   | -0.75/-1.25            | TP     | Normal R-G and strong B-Y defect       | Normal                               | ND                                 |

|                                    |             |                     |                   |               |           |                                           |                                        |                               |
|------------------------------------|-------------|---------------------|-------------------|---------------|-----------|-------------------------------------------|----------------------------------------|-------------------------------|
| 144f                               | ND          | 6/6<br>6/6 (6)      | 6/9<br>6/9 (27)   | +2.5/+2.0     | Normal    | ND                                        | ND                                     | ND                            |
| 145a                               | 52          | 6/12<br>6/12 (52)   |                   | -1.5/-1.25    | TP        | Moderate R-G and strong B-Y defect        | Normal                                 | Normal                        |
| 145b                               | 13          | 6/60<br>6/60 (59)   |                   | -1.5/-0.5     | TP        | Strong R-G and B-Y defect                 | Normal                                 | Normal                        |
| 145c                               | 6           | 6/36<br>6/36 (20)   | 6/60<br>3/60 (37) | Emmetropia    | TP        | Moderate R-G and B-Y defect               | Prolonged latency                      | Severely reduced amplitudes   |
| 145d                               | ND          | 6/6<br>6/6 (27)     |                   | Emmetropia    | Normal    | ND                                        | ND                                     | ND                            |
| 145e                               | 4           | 6/36<br>6/36 (10)   | 6/60<br>6/36 (24) | -2.0/-2.25    | TP        | Moderate R-G defect                       | Normal                                 | Reduced amplitudes            |
| 145g                               | ND          | 6/12<br>6/36 (39)   | 6/12<br>6/36(43)  | -3.25/-2.75   | TP        | Mild R-G and strong B-Y defect            | Normal                                 | Reduced amplitudes            |
| 145h                               | 7           | 6/36<br>6/36(47)    | 6/36<br>6/36 (62) | -1.25/-1.0    | TP        | ND                                        | Reduced amplitudes, prolonged latency  | Reduced amplitudes            |
| 145j                               | 5           | 6/9<br>6/9(5)       | 6/12<br>6/12 (15) | Emmetropia    | Normal    | Normal                                    | Reduced amplitudes                     | Reduced amplitudes            |
| 145k                               | 7           | 6/12<br>6/18 (7)    | 6/12<br>6/18 (13) | +1.0/+1.5     | TP        | Mild R-G defect                           | Normal                                 | Normal                        |
| 145l                               | ND          | 6/6<br>6/6 (24)     |                   | Emmetropia    | normal    | Mild R-G and B-Y defect                   | Reduced amplitudes                     | Reduced amplitudes            |
| 145m                               | 14          | 6/9<br>6/9 (28)     |                   | -4.5/-4.5     | TP        | Mild R-G and B-Y defect                   | Normal                                 | Severely reduced amplitudes   |
| 146a                               | 28          | 6/24<br>6/18 (34)   | 3/60<br>2/60 (53) | -4.25/-4.0    | TP        | Mild R-G and strong B-Y defect            | ND                                     | ND                            |
| 147b                               | 7           | 6/12<br>6/12 (37)   |                   | -3.0/-3.5     | TP        | Moderat B-Y defect                        | Reduced amplitudes                     | Reduced amplitudes            |
| <b>Exon 27; c.2708_2711delTTAG</b> |             |                     |                   |               |           |                                           |                                        |                               |
| 149b                               | 5           | 6/36<br>6/36 (5)    |                   | Emmetropia    | TP        | Moderate R-G and strong B-Y defect        | Prolonged latency, Spike trains        | Severely reduced amplitudes   |
| 149c                               | 3           | 6/36<br>6/36 (7)    | 2/60<br>2/60 (39) | Emmetropia    | TP        | Strong R-G and B-Y defect                 | Reduced amplitudes, Spike trains       | ND                            |
| 149d                               | No symptoms | 6/7.5<br>6/7.5 (41) |                   | -5.5/-7.0     | Myopic TP | Moderate defect without preferential axis | Normal                                 | ND                            |
| 150a                               | 4           | 6/36<br>6/36 (7)    | 6/60<br>6/60 (22) | Emmetropia    | TP        | Moderate R-G and B-Y defect               | ND                                     | ND                            |
| 150c                               | 8           | 6/18<br>6/24 (37)   | 6/24<br>6/24 (43) | -4.5/-5.25    | TP        | Mild R-G and B-Y defect                   | ND                                     | ND                            |
| 151a                               | 5           | 6/36<br>6/36 (7)    |                   | +1.5/+1.5     | TP        | Normal                                    | Normal                                 | Severely reduced amplitudes   |
| 151c                               | 7           | 6/60<br>6/60 (34)   |                   | Emmetropia    | TP        | ND                                        | ND                                     | ND                            |
| 152a                               | 7           | 3/36<br>2/36 (47)   | 3/60<br>1/36 (69) | -1/Emmetropia | TP        | ND                                        | Prolonged implicit times, Spike trains | Normal                        |
| 152b                               | 4           | 6/7,5<br>6/7,5 (9)  | 6/18<br>6/18 (12) | -1/-0.75      | TP        | Normal R-G and mild B-Y defect            | Normal                                 | Severely reduced amplitudes   |
| 152c                               | 8           | 6/6<br>6/7.5 (16)   |                   | +0.5/+0.5     | TP        | Normal                                    | Spike trains                           | Moderately reduced amplitudes |

|      |    |                     |                    |             |                    |                           |                                  |                                                         |
|------|----|---------------------|--------------------|-------------|--------------------|---------------------------|----------------------------------|---------------------------------------------------------|
| 152d | 18 | 6/60<br>2/60 (45)   | 3/60<br>2/60 (67)  | -5.75/-5.75 | TP                 | Moderate                  | ND                               | ND                                                      |
| 152e | 43 | 6/6<br>6/6 (43)     |                    | -4/-4.25    | Myopic             | Normal                    | Slightly prolonged latency       | Severely reduced amplitudes                             |
| 152f | 33 | 6/12<br>6/60 (34)   | 6/18<br>6/60 (41)  | +2.25/+5.25 | TP                 | Mild R-G and B-Y defect   | Normal                           | Reduced amplitudes                                      |
| 153a | 6  | 6/60<br>6/60 (47)   |                    | -0.75/-0.75 | TP                 | Anamnestically reduced    | ND                               | ND                                                      |
| 154a | 4  | 6/24<br>6/24 (4)    | 6/60<br>6/60 (19)  | -1/-1       | TP                 | Strong R-G and B-Y defect | Normal                           | Severely reduced                                        |
| 155c | 48 | 6/7.5<br>6/9 (49)   |                    | -2.5/-0.5   | TP                 | Moderate R-G defect       | Normal                           | Severely reduced                                        |
| 156a | 10 | 6/7.5<br>6/7.5 (10) | 6/12<br>6/12 (23)  | -7/-6.5     | TP                 | Normal                    | Normal                           | Normal                                                  |
| 156d | 9  | 6/9<br>6/6 (9)      | 6/9.5<br>6/9.5 (8) | Emmetropia  | Normal optic discs | Normal                    | Normal                           | Reduced amplitudes                                      |
| 156e | 11 | 6/9<br>6/9 (40)     | 6/15<br>6/15 (44)  | Emmetropia  | TP                 | Strong B-Y defect         | ND                               | ND                                                      |
| 157a | 18 | 6/15<br>6/30 (37)   |                    | Emmetropia  | TP                 | Normal                    | Normal                           | Slightly reduced amplitudes, slightly prolonged latency |
| 158a | 14 | 6/12<br>6/12 (14)   | 6/18<br>6/24 (21)  | -1/-1       | TP                 | Strong R-G and B-Y defect | Reduced amplitudes, Spike trains | Normal                                                  |

TP: Temporal pallor of the optic disc; R: Right; L: Left; VA: Visual Acuity; Sph.eq.: Spherical equivalent; VEP: Visual evoked Potentials; R-G: Red-Green; B-Y: Blue-Yellow; ND: No data available
